# Supplementary material
Source: Springer Nature journal article supplement (https://www.springermedizin.de/resource/supplementary/12885_2011_2727_MOESM3_ESM.pdf/9461908)

**A.**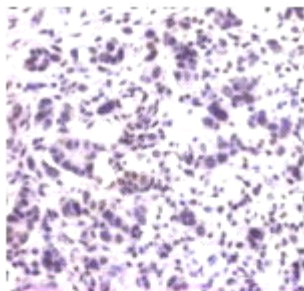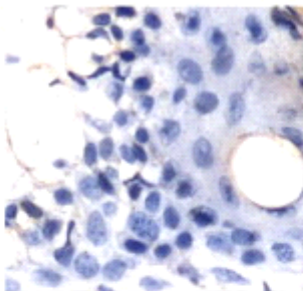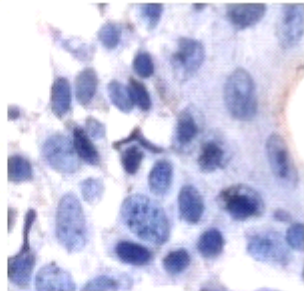**B.**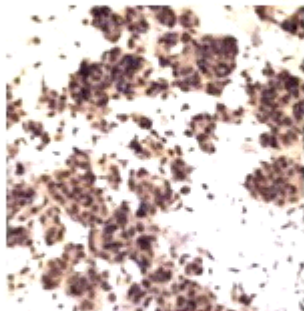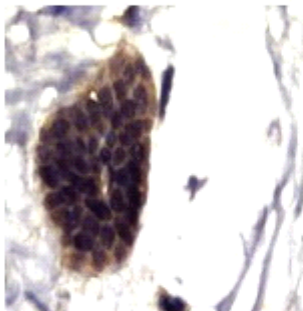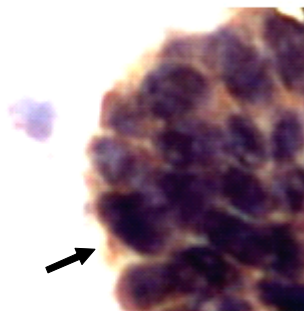**C.**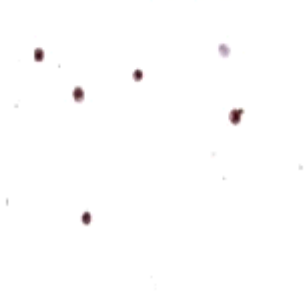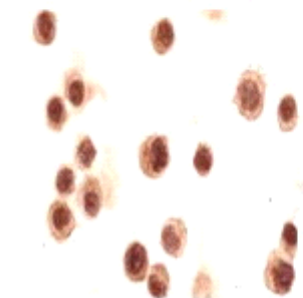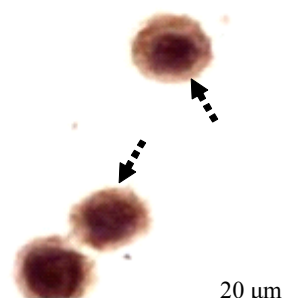

40 ×

200 ×

400 ×

Supplement: MOESM3 [file 9461908]
